# Supplementary material for: Upregulation of sex-determining region Y-box 9 (SOX9) promotes cell proliferation and tumorigenicity in esophageal squamous cell carcinoma
Source: PubMed Central journal article supplement (PMC4741601; doi:10.18632/oncotarget.5160), 2015-09-04
Supplement: oncotarget-06-31241-s001.pdf [file oncotarget-06-31241-s001.pdf]

SUPPLEMENTARY FIGURES AND TABLES

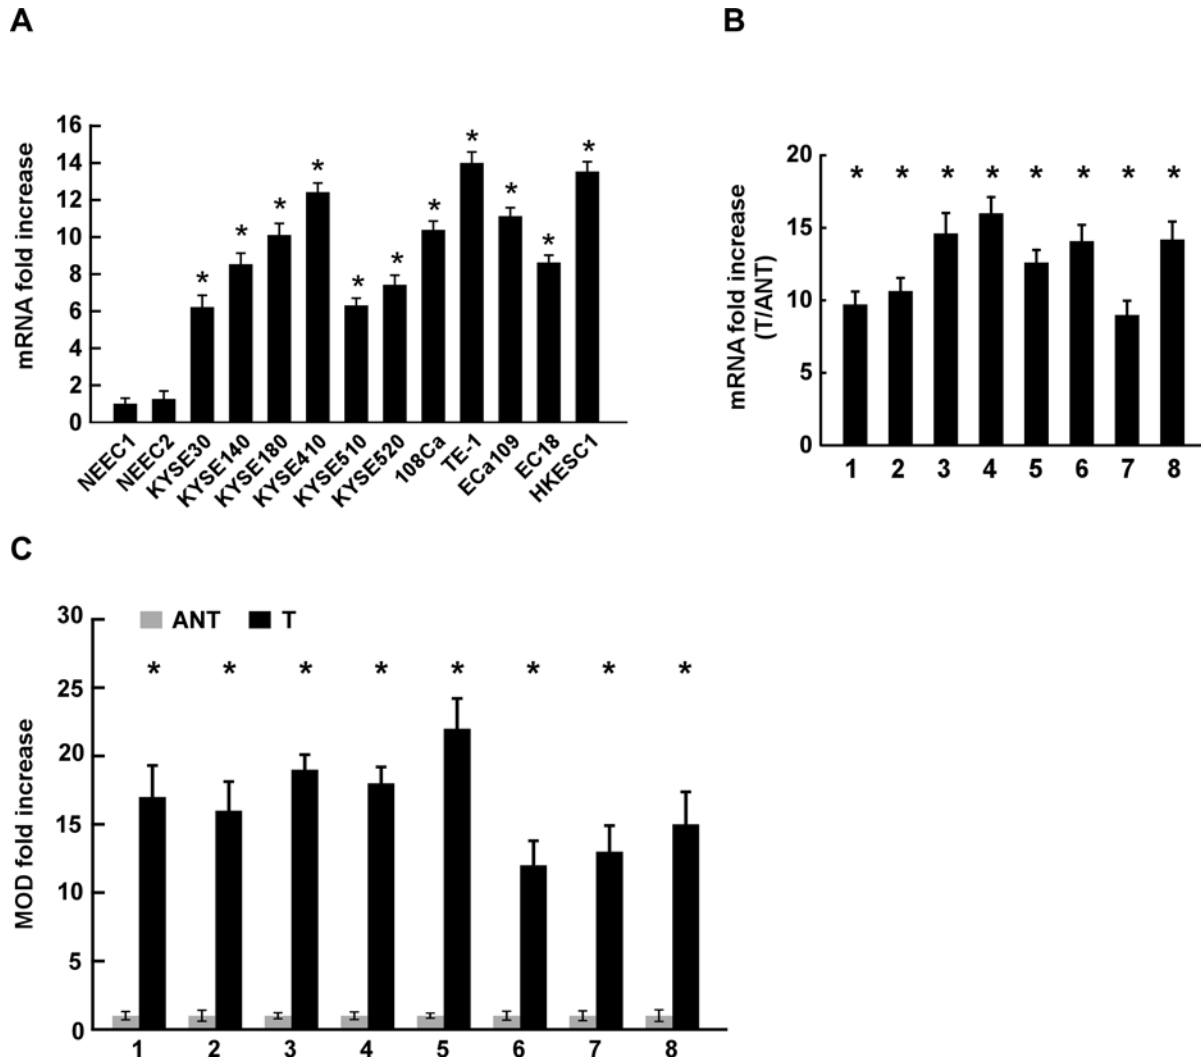

**Supplementary Figure S1: SOX9 is overexpressed in ESCC cell lines and ESCC tissues.** A–B. Real-time PCR analysis of *SOX9* expression in ESCC cell lines (A) and in eight paired ESCC (T) and adjacent non-tumor tissue (ANT) specimens (B). C. Statistical analyses of the MOD of *SOX9* staining in eight paired ESCC (T) and adjacent non-tumor tissue (ANT) specimens. Bars represent the mean ± SD of three independent experiments. \**P* < 0.05.

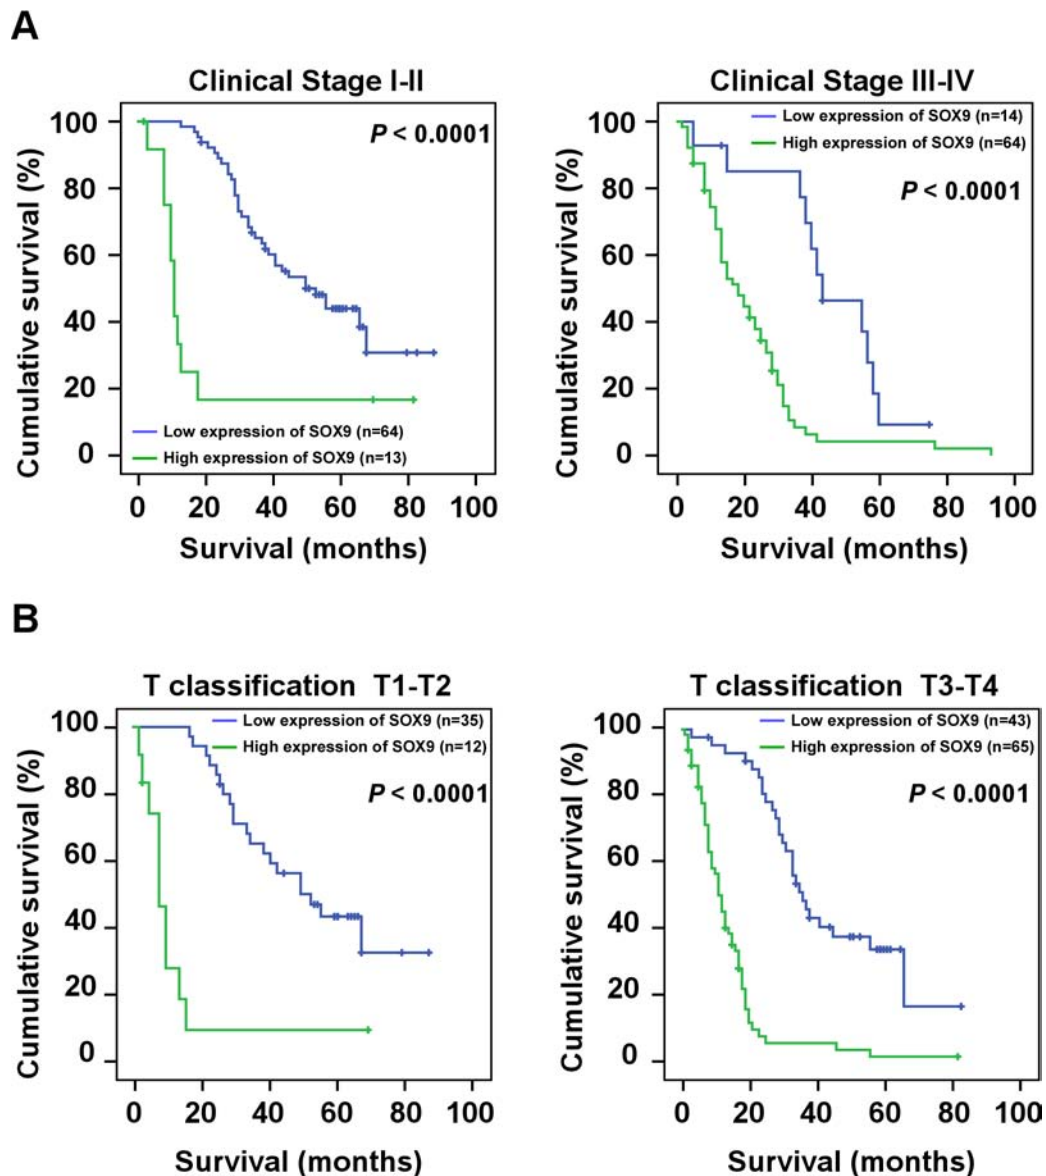

**Supplementary Figure S2: Kaplan–Meier analysis of correlation between SOX9 protein levels and survival in patient subgroups.** **A.** Comparison of the statistical significance of the difference between the survival curves of patients with high and low SOX9 expression in the clinical Stage I+II (left) or clinical Stage III+IV (right) subgroups. **B.** Comparison of the statistical significance of the difference between the survival curves of patients with high and low SOX9 expression in the T1–T2 (left) and T3–T4 (right) subgroups. *P*-values were calculated using the log-rank test.

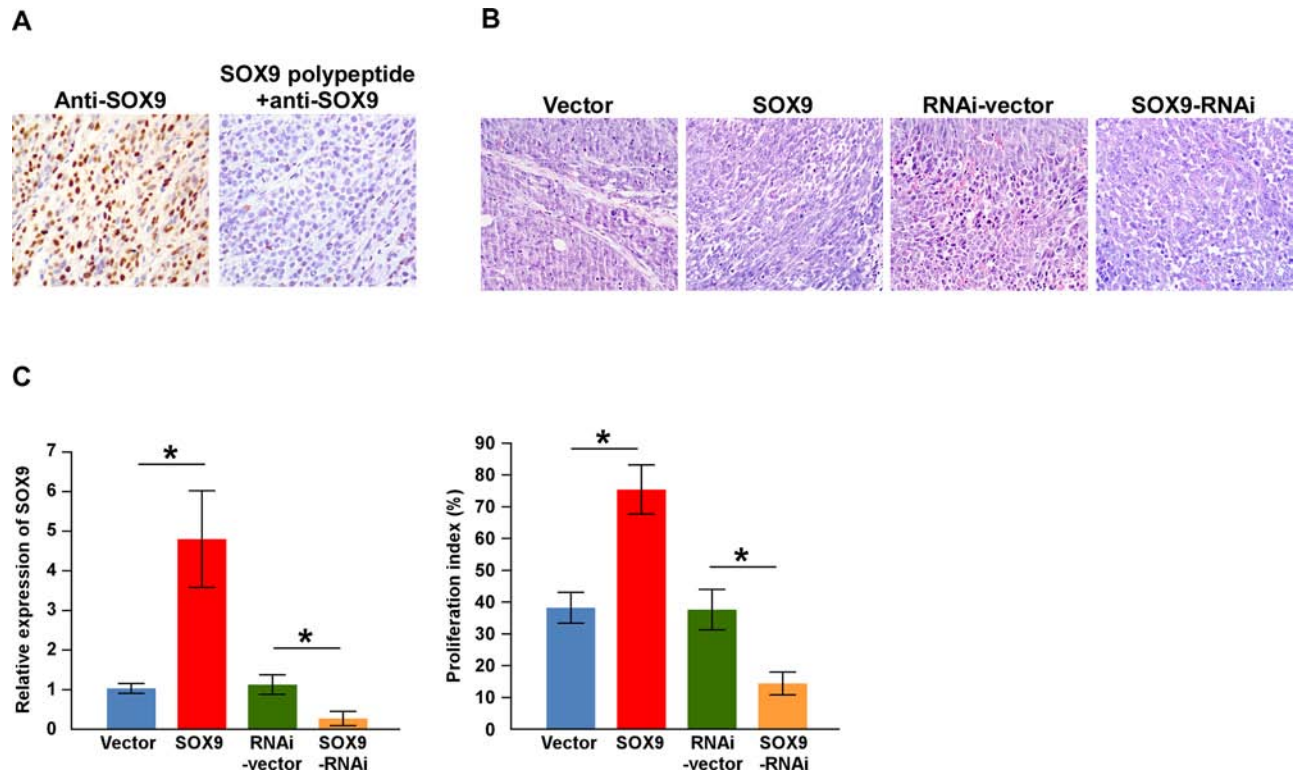

**Supplementary Figure S3: Upregulation of SOX9 enhances the tumorigenicity of ESCC cells *in vivo*.** **A.** The specificity of anti-SOX9 antibody was verified by IHC staining with anti-SOX9 or anti-SOX9 combined with recombinant SOX9 polypeptide, which completely blocked the staining by anti-SOX9. **B.** Hematoxylin and eosin staining of the tumors in the mice. **C.** Relative expression of SOX9 and the proliferation index indicating Ki67 expression as determined by IHC staining in the mice.

**Supplementary Table S1: Clinicopathological characteristics of patient samples and SOX9 expression in ESCC**

|                                    | Number of cases (%) |
|------------------------------------|---------------------|
| <b>Gender</b>                      |                     |
| Male                               | 116(74.8)           |
| Female                             | 39(25.2)            |
| <b>Age (years)</b>                 |                     |
| ≤57                                | 80(51.6)            |
| >57                                | 75(48.4)            |
| <b>Clinical stage</b>              |                     |
| I                                  | 7(4.5)              |
| IIA                                | 70(45.2)            |
| IIB                                | 15(9.7)             |
| III                                | 56(36.1)            |
| IV                                 | 7(4.5)              |
| <b>T classification</b>            |                     |
| T1                                 | 9(5.8)              |
| T2                                 | 38(24.5)            |
| T3                                 | 95(61.3)            |
| T4                                 | 13(8.4)             |
| <b>N classification</b>            |                     |
| N0                                 | 85(54.8)            |
| N1                                 | 70(45.2)            |
| <b>M classification</b>            |                     |
| M0                                 | 148(95.5)           |
| M1                                 | 7(4.5)              |
| <b>Differentiation</b>             |                     |
| Well                               | 70(45.2)            |
| Moderate                           | 56(36.1)            |
| Poor                               | 29(18.7)            |
| <b>Vital status (at follow-up)</b> |                     |
| Alive                              | 41(26.5)            |
| Death                              | 114(73.5)           |
| <b>Expression of SBSN</b>          |                     |
| Low expression                     | 78(50.3)            |
| High expression                    | 77(49.7)            |

**Supplementary Table S2: Spearman correlation analysis of SOX9 expression and clinical pathologic factors**

| Variables                     | SOX9 expression level |         |
|-------------------------------|-----------------------|---------|
|                               | Spearman correlation  | P-value |
| Gender                        | -0.130                | 0.107   |
| Age                           | 0.026                 | 0.745   |
| Clinical stage                | 0.683                 | <0.0001 |
| T classification              | 0.323                 | <0.0001 |
| N classification              | 0.628                 | <0.0001 |
| M classification              | 0.219                 | 0.006   |
| Differentiation               | 0.220                 | 0.006   |
| Tumor size                    | 0.367                 | <0.0001 |
| Survival time                 | -0.730                | <0.0001 |
| Survival status (Alive/death) | 0.303                 | <0.0001 |
